# Supplementary material for: Whole Genome Amplification in Preimplantation Genetic Testing in the Era of Massively Parallel Sequencing
Source: MDPI journal article supplement (doi:10.3390/ijms23094819), 2022-04-27
Supplement: s1 [file s1]

**Supplementary Table S1.** Commercial WGA kits.

|                        |                                                               |                                                                       |                                     |                                                                      |
|------------------------|---------------------------------------------------------------|-----------------------------------------------------------------------|-------------------------------------|----------------------------------------------------------------------|
| DOP-PCR                | DOPlify by Perkin Elmer                                       |                                                                       |                                     |                                                                      |
| MDA                    | REPLI-g by Qiagen                                             | GenomiPhi V2 by Cytiva                                                | Illustra GenomiPhi by GE Healthcare | TruePrime by Sygnis (non hexamer-based WGA)                          |
| MALBAC                 | MALBAC by Yicon Genomics                                      | ChromInst by Yicon Genomics (integrating WGA and library preparation) |                                     |                                                                      |
| Ligation- mediated PCR | Ampli1 by Silicon Biosystems                                  |                                                                       |                                     |                                                                      |
| Hybrid methods         | PicoPlex by Takara (originally developed by Rubicon genomics) | GenomePlex by Merck (formely Sigma Aldrich)                           | SurePlex by Illumina                | PicoSeq by Takara (PicoPlex integrating WGA and library preparation) |
